# Supplementary material for: Bioaccumulation of Lead, Cadmium, and Arsenic in a Mining Area and Its Associated Health Effects
Source: MDPI journal article supplement (doi:10.3390/toxics11060519), 2023-06-09
Supplement: s1 [file s1]

**Table S1. General characteristics of the study participants**

|                                           | Total                   | Men                     | Women                   | p-value* |
|-------------------------------------------|-------------------------|-------------------------|-------------------------|----------|
| Total, n (%)                              | 58 (100)                | 19 (32.8)               | 39 (67.2)               |          |
| Age, AM±SD (year)                         | 69.4±11.9               | 67.9±10.2               | 70.1±12.7               | 0.513    |
| BMI, AM±SD (kg/m <sup>2</sup> )           | 23.8±3.9                | 23.7±3.5                | 23.9±4.1                | 0.810    |
| Duration of residence, AM±SD (year)       | 45.3±20.0               | 49.4±21.1               | 43.2±19.4               | 0.272    |
| Mining work experience, n (%)             | 2 (3.5)                 | 1 (5.3)                 | 1 (2.6)                 | 0.279    |
| Current or ex-smokers, n (%)              | 12 (20.7)               | 12 (63.2)               | -                       | <0.001   |
| Alcoholic drinkers, n (%)                 | 28 (48.3)               | 16 (84.2)               | 12 (30.8)               | <0.001   |
| Rice consumption >50%, n (%) <sup>a</sup> | 40 (69.0)               | 15 (78.9)               | 25 (64.1)               | 0.251    |
| Hypertension, n (%)                       | 25 (44.6)               | 7 (38.9)                | 18 (47.4)               | 0.551    |
| Diabetes, n (%)                           | 9 (15.5)                | 4 (21.1)                | 5 (12.8)                | 0.416    |
| Blood Pb, GM (95% CI) (µg/dL)             | 1.80 (1.54, 2.09)       | 1.66 (1.25, 2.21)       | 1.87 (1.55, 2.25)       | 0.489    |
| Blood Cd, GM (95% CI) (µg/L)              | 2.12 (1.73-2.59)        | 1.21 (0.99-1.50)        | 2.77 (2.17-3.54)        | <0.001   |
| Urinary Cd, GM (95% CI) (µg/L)            | 2.69 (2.23-3.25)        | 2.02 (1.53-2.66)        | 3.09 (2.43-3.93)        | 0.022    |
| Urinary iAs, GM (95% CI) (µg/L)           | 0.22 (0.14, 0.33)       | 0.27 (0.11, 0.62)       | 0.20 (0.12, 0.32)       | 0.519    |
| Urinary total As, GM (95% CI) (µg/L)      | 51.76<br>(42.42, 63.16) | 48.75<br>(36.26, 65.54) | 53.30<br>(40.81, 69.61) | 0.706    |

[Abbreviation] AM arithmetic mean; SD standard deviation; Pb lead; Cd cadmium; iAs inorganic arsenic; total As sum of As<sup>3+</sup>, As<sup>5+</sup>, MMA, DMA; GM geometric mean; CI confidence interval;

\* *p*-values were calculated by chi-square tests or Wilcoxon tests for the difference between men and women.

<sup>a</sup> Proportions of locally produces rice consumption to that of total rice consumption;

**Table S2. Multiple and logistic regression analyses**

| Factors                      | Multiple regression               |                 | Logistic regression                |                         |        |                 |
|------------------------------|-----------------------------------|-----------------|------------------------------------|-------------------------|--------|-----------------|
|                              | eGFR (ml/min/1.73m <sup>2</sup> ) |                 | eGFR <90 ml/min/1.73m <sup>2</sup> |                         |        |                 |
|                              | β                                 | <i>p</i> -value | OR                                 | 95% Confidence interval |        | <i>p</i> -value |
| Age (year)                   | -0.502                            | 0.003           | 1.16                               | (1.03                   | 1.31)  | 0.015           |
| Gender                       | -0.717                            | 0.858           | 0.42                               | (0.03                   | 6.23)  | 0.532           |
| Duration of residence (year) | -0.091                            | 0.317           | 0.99                               | (0.93                   | 1.04)  | 0.604           |
| Blood Pb (µg/dL)             | 2.867                             | 0.454           | 0.96                               | (0.15                   | 5.97)  | 0.964           |
| Blood Cd (µg/L)              | -5.473                            | 0.142           | 1.58                               | (0.21                   | 11.73) | 0.650           |
| Urinary Cd (µg/L)            | 4.368                             | 0.178           | 0.96                               | (0.21                   | 4.47)  | 0.962           |
| Urinary total As (µg/L)      | -4.536                            | 0.094           | 3.86                               | (0.89                   | 16.65) | 0.07            |

[Abbreviation] eGFR: estimated glomerular filtration rate; OR: Odds Ratio

[Note] The concentrations of blood Pb and Cd, urinary Cd and total As were log-transformed.
